# Supplementary material for: Antileukemic Scalarane Sesterterpenoids and Meroditerpenoid from Carteriospongia (Phyllospongia) sp., Induce Apoptosis via Dual Inhibitory Effects on Topoisomerase II and Hsp90
Source: PubMed Central journal article supplement (PMC5086919; doi:10.1038/srep36170), 2016-10-31
Supplement: srep36170-s1.pdf [file srep36170-s1.pdf]

## Supplementary Information

### **Antileukemic Scalarane Sesterterpenoids and Meroditerpenoid from *Carteriospongia (Phyllospongia) sp.*, Induce Apoptosis via Dual Inhibitory Effects on Topoisomerase II and Hsp90**

Kuei-Hung Lai<sup>1,2,3,4,+</sup>, Yi-Chang Liu<sup>5,6,+</sup>, Jui-Hsin Su<sup>1,2</sup>, Mohamed El-Shazly<sup>7</sup>, Chih-Fung Wu<sup>8</sup>, Ying-Chi Du<sup>1,2,3</sup>, Yu-Ming Hsu<sup>3</sup>, Juan-Cheng Yang<sup>9,10</sup>, Ming-Kai Weng<sup>1</sup>, Chia-Hua Chou<sup>1,2</sup>, Guan-Yu Chen<sup>9,10</sup>, Yu-Cheng Chen<sup>11</sup> & Mei-Chin Lu<sup>1,2,\*</sup>

<sup>1</sup>Graduate Institute of Marine Biology, National Dong Hwa University, Pingtung, 944, Taiwan.

<sup>2</sup>National Museum of Marine Biology & Aquarium, Pingtung 944, Taiwan. <sup>3</sup>Graduate Institute of Natural Products, College of Pharmacy, Kaohsiung Medical University, Kaohsiung 807, Taiwan.

<sup>4</sup>Division of Pharmacognosy, Department of Medicinal Chemistry, Uppsala University, Uppsala, Sweden.

<sup>5</sup>Division of Hematology-Oncology, Department of Internal Medicine, Kaohsiung Medical University Hospital, Kaohsiung, 807, Taiwan. <sup>6</sup>Department of Internal Medicine, Faculty of Medicine, College of Medicine, Kaohsiung Medical University, Kaohsiung, 807, Taiwan.

<sup>7</sup>Department of Pharmacognosy and Natural Products Chemistry, Faculty of Pharmacy, Ain-Shams University, Organization of African Unity Street, Abassia, Cairo 11566, Egypt.

<sup>8</sup>Division of Surgical Oncology, Department of Surgery, Kaohsiung Medical University Hospital, Kaohsiung 807, Taiwan. <sup>9</sup>School of Pharmacy, College of Pharmacy, China Medical University, Taichung, Taiwan. <sup>10</sup>Chinese Medicine Research and Development Center, China Medical University Hospital, Taichung, Taiwan.

<sup>11</sup>The Ph.D. Program for Cancer Biology and Drug Discovery, China Medical University and Academia Sinica, Taichung, Taiwan. <sup>+</sup>K.-H. L. and Y.-C. L. contributed equally to this study. <sup>\*</sup>Correspondence and requests for materials should be addressed to M.-C. Lu (jinx6609@yahoo.com.tw).

## Table of Contents

|                                                                                                 |    |
|-------------------------------------------------------------------------------------------------|----|
| <b>Figure S1:</b> $^1\text{H}$ NMR (500 MHz, $\text{CDCl}_3$ ) spectrum of <b>1</b> . -----     | 3  |
| <b>Figure S2:</b> $^{13}\text{C}$ NMR (125 MHz, $\text{CDCl}_3$ ) spectrum of <b>1</b> . -----  | 4  |
| <b>Figure S3:</b> DEPT NMR (125 MHz, $\text{CDCl}_3$ ) spectrum of <b>1</b> . -----             | 5  |
| <b>Figure S4:</b> COSY NMR (500 MHz, $\text{CDCl}_3$ ) spectrum of <b>1</b> . -----             | 6  |
| <b>Figure S5:</b> NOESY NMR (500 MHz, $\text{CDCl}_3$ ) spectrum of <b>1</b> . -----            | 7  |
| <b>Figure S6:</b> HSQC NMR (500 MHz, $\text{CDCl}_3$ ) spectrum of <b>1</b> . -----             | 8  |
| <b>Figure S7:</b> HMBC NMR (500 MHz, $\text{CDCl}_3$ ) spectrum of <b>1</b> . -----             | 9  |
| <b>Figure S8:</b> HRESIMS spectrum of <b>1</b> . -----                                          | 10 |
| <b>Figure S9:</b> IR spectrum of <b>1</b> . -----                                               | 11 |
| <b>Figure S10:</b> $^1\text{H}$ NMR (500 MHz, $\text{CDCl}_3$ ) spectrum of <b>2</b> . -----    | 12 |
| <b>Figure S11:</b> $^{13}\text{C}$ NMR (125 MHz, $\text{CDCl}_3$ ) spectrum of <b>2</b> . ----- | 13 |
| <b>Figure S12:</b> DEPT NMR (125 MHz, $\text{CDCl}_3$ ) spectrum of <b>2</b> . -----            | 14 |
| <b>Figure S13:</b> COSY NMR (500 MHz, $\text{CDCl}_3$ ) spectrum of <b>2</b> . -----            | 15 |
| <b>Figure S14:</b> NOESY NMR (500 MHz, $\text{CDCl}_3$ ) spectrum of <b>2</b> . -----           | 16 |
| <b>Figure S15:</b> HSQC NMR (500 MHz, $\text{CDCl}_3$ ) spectrum of <b>2</b> . -----            | 17 |
| <b>Figure S16:</b> HMBC NMR (500 MHz, $\text{CDCl}_3$ ) spectrum of <b>2</b> . -----            | 18 |
| <b>Figure S17:</b> HRESIMS spectrum of <b>2</b> . -----                                         | 19 |
| <b>Figure S18:</b> IR spectrum of <b>2</b> . -----                                              | 20 |
| <b>Figure S19:</b> Values of $\Delta\delta_{S-R}$ of the MTPA esters of <b>2</b> . -----        | 21 |
| <b>Figure S20:</b> The full length gel of Topo II $\alpha$ activity. -----                      | 22 |
| <b>Figure S21:</b> The full length blots of caspase 9, 8 and 3 expressions. -----               | 23 |

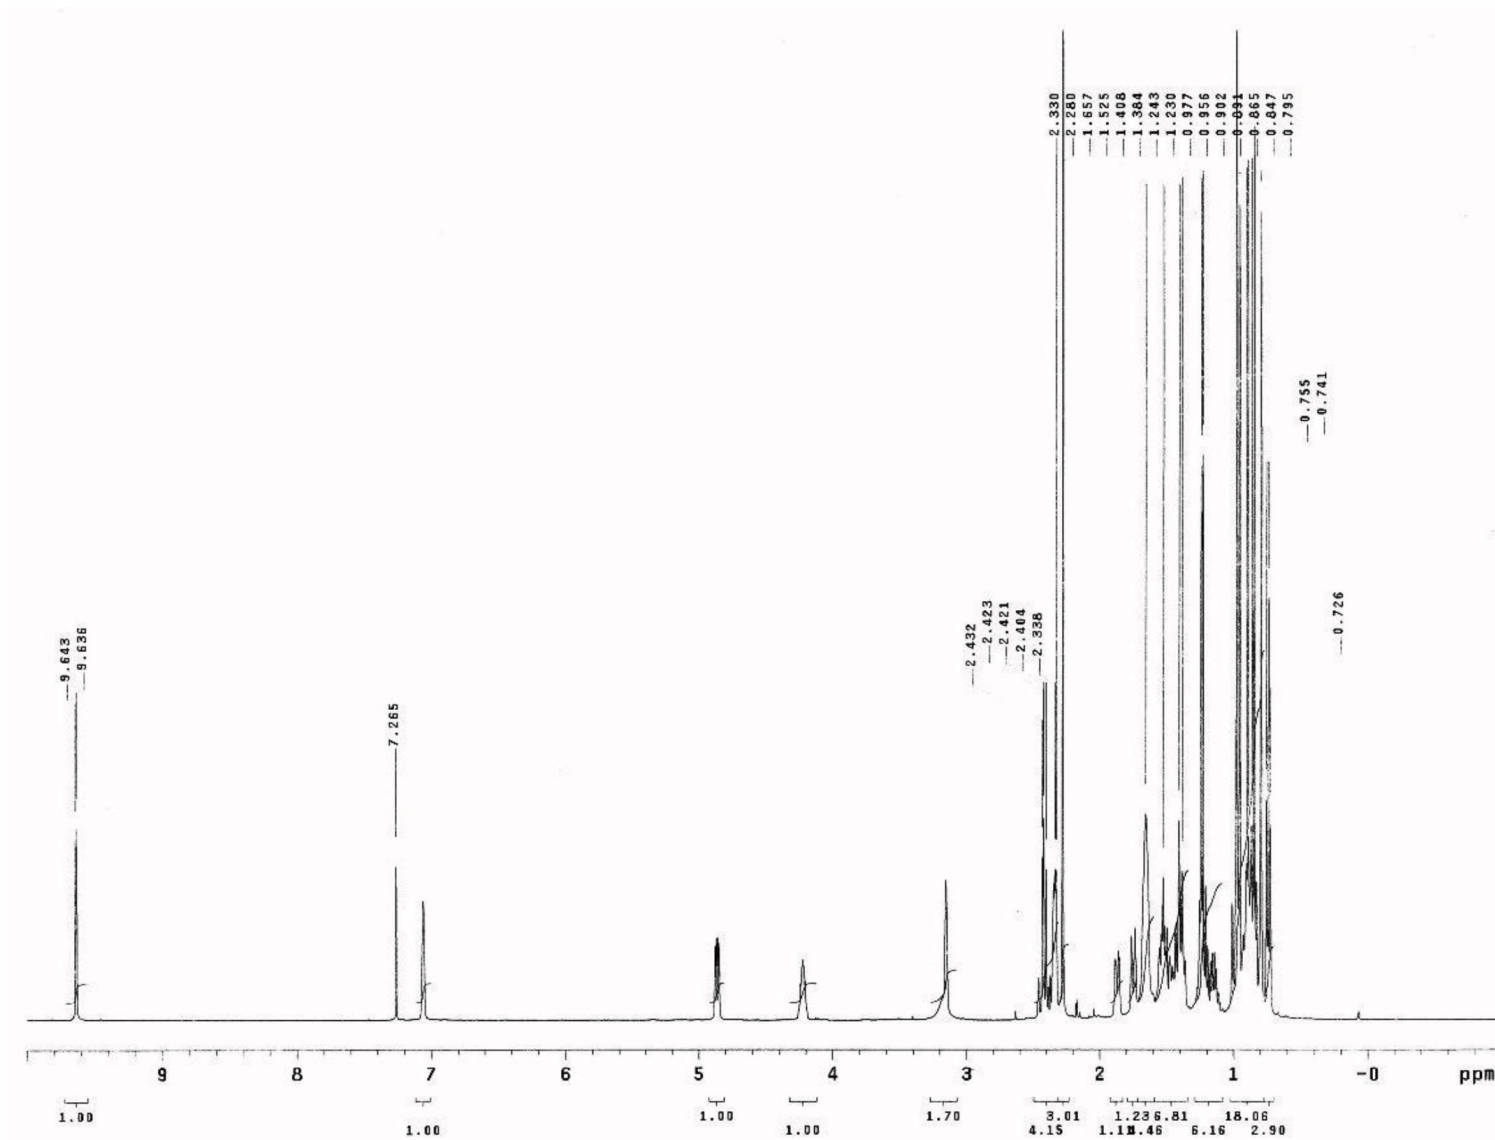

Figure S1:  $^1\text{H}$  NMR (500 MHz,  $\text{CDCl}_3$ ) spectrum of **1**.

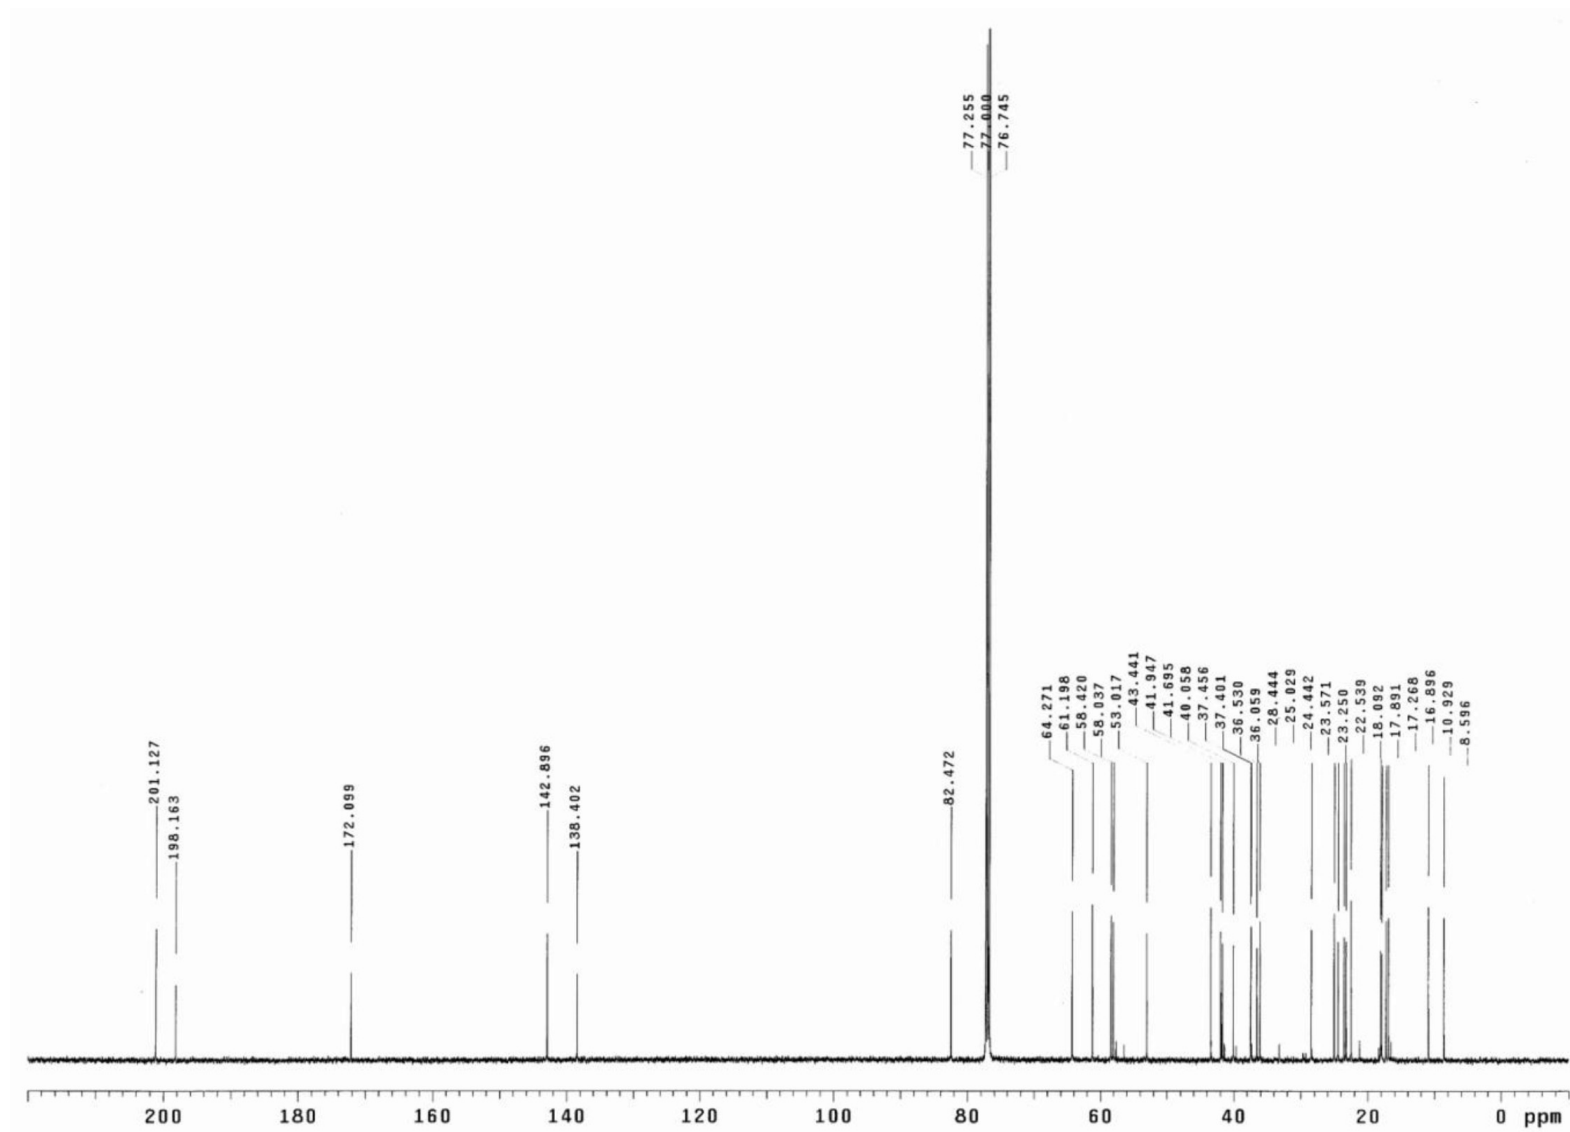

**Figure S2:** <sup>13</sup>C NMR (125 MHz, CDCl<sub>3</sub>) spectrum of 1.

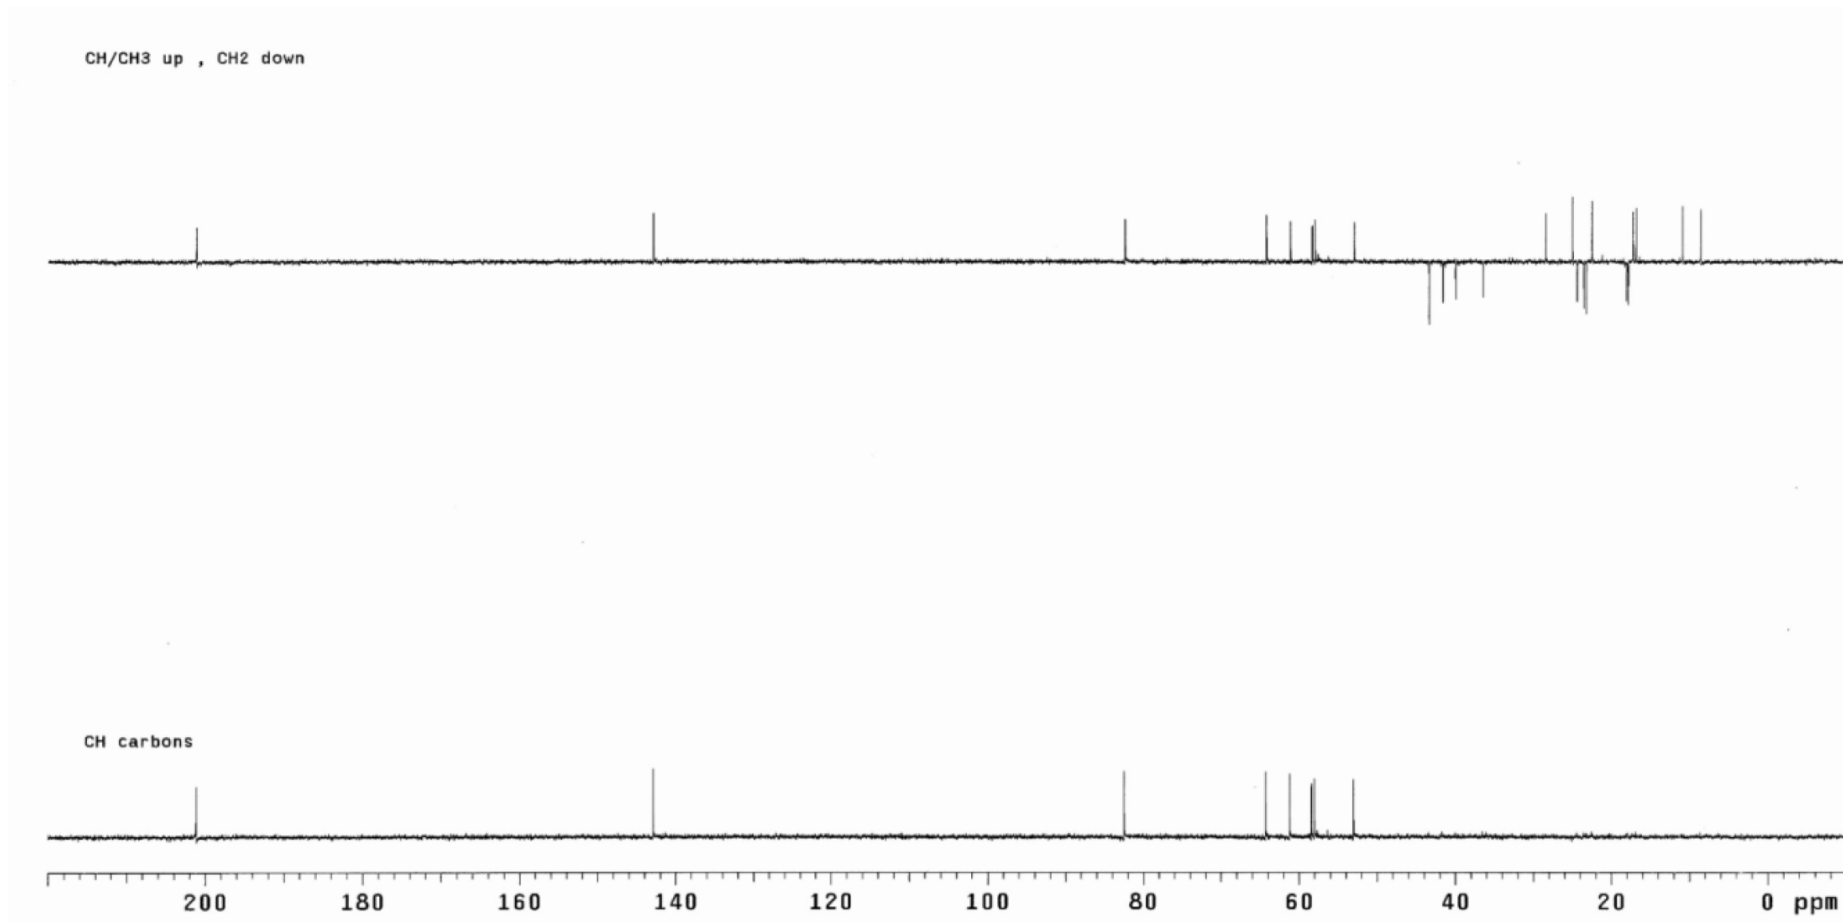

**Figure S3:** DEPT NMR (125 MHz, CDCl<sub>3</sub>) spectrum of **1**.

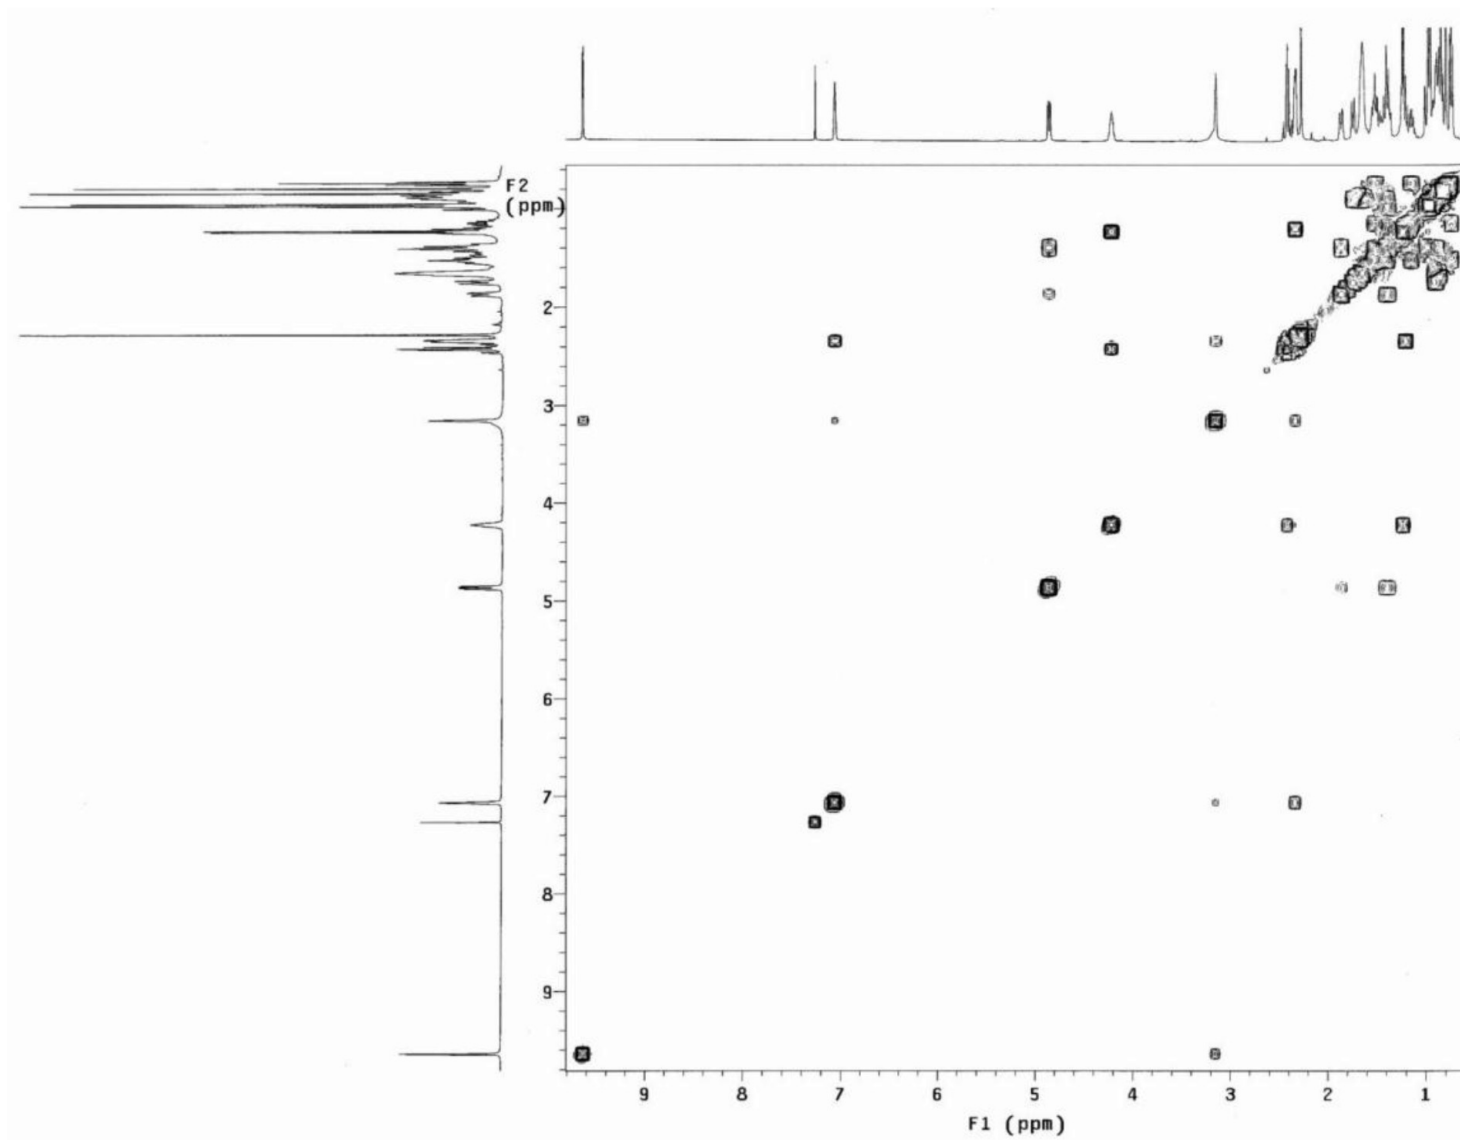

**Figure S4:** COSY NMR (500 MHz, CDCl<sub>3</sub>) spectrum of **1**.

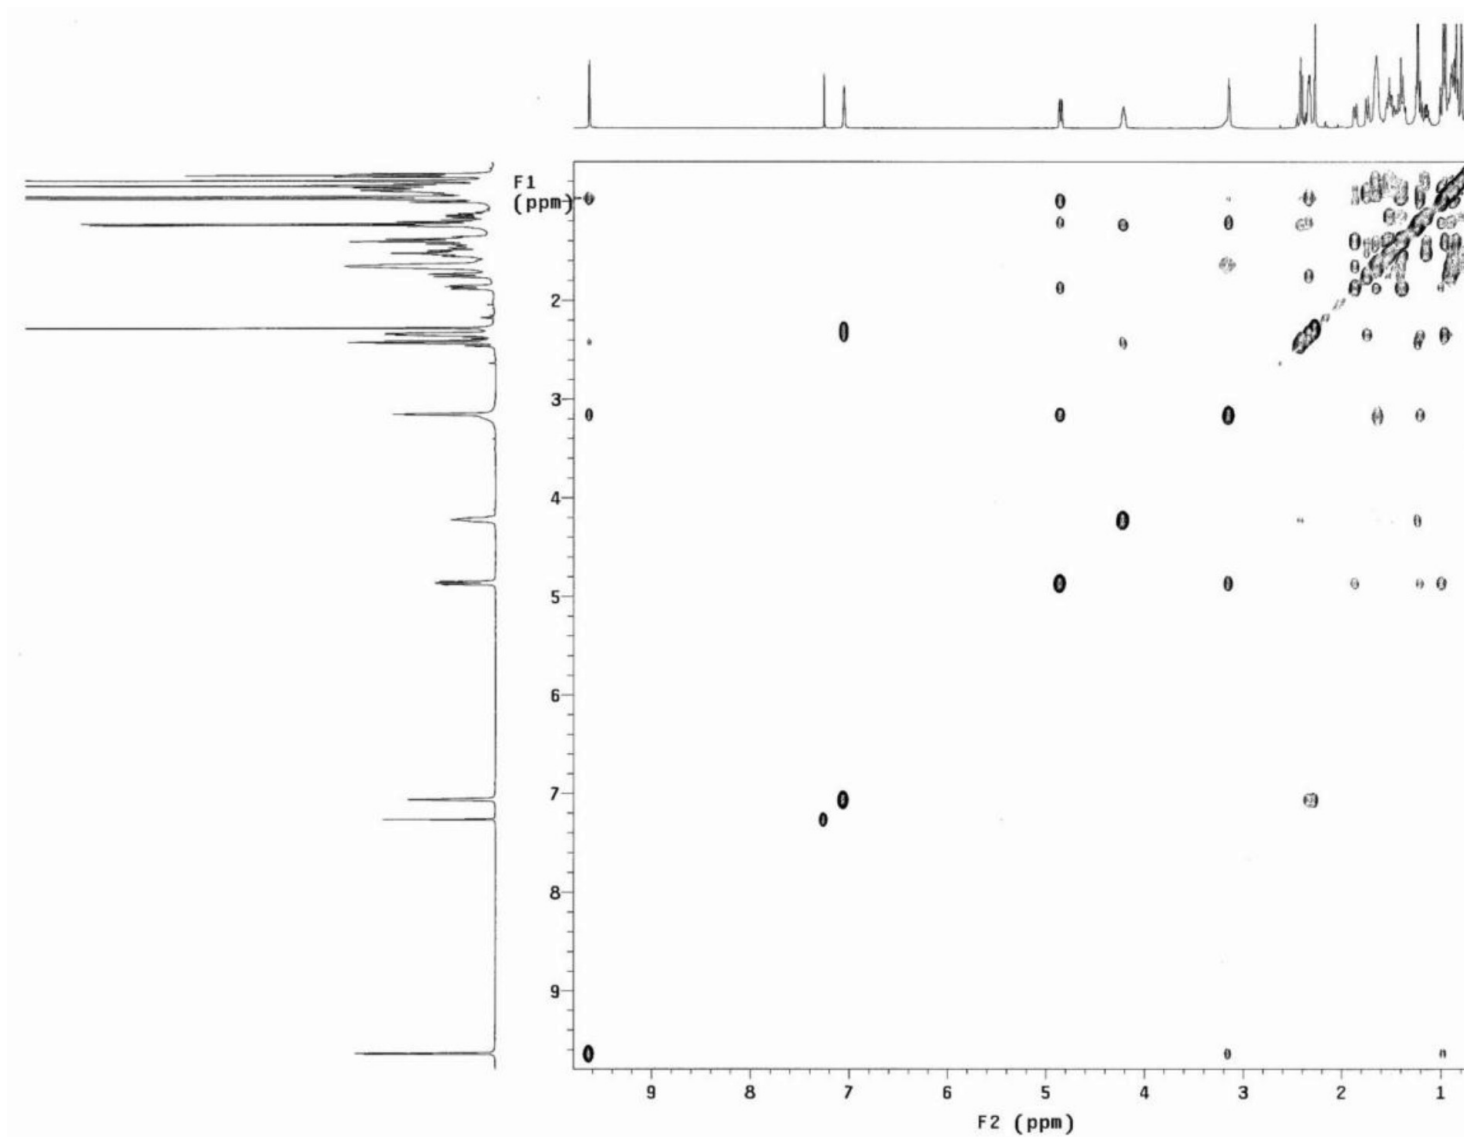

**Figure S5:** NOESY NMR (500 MHz, CDCl<sub>3</sub>) spectrum of **1**.

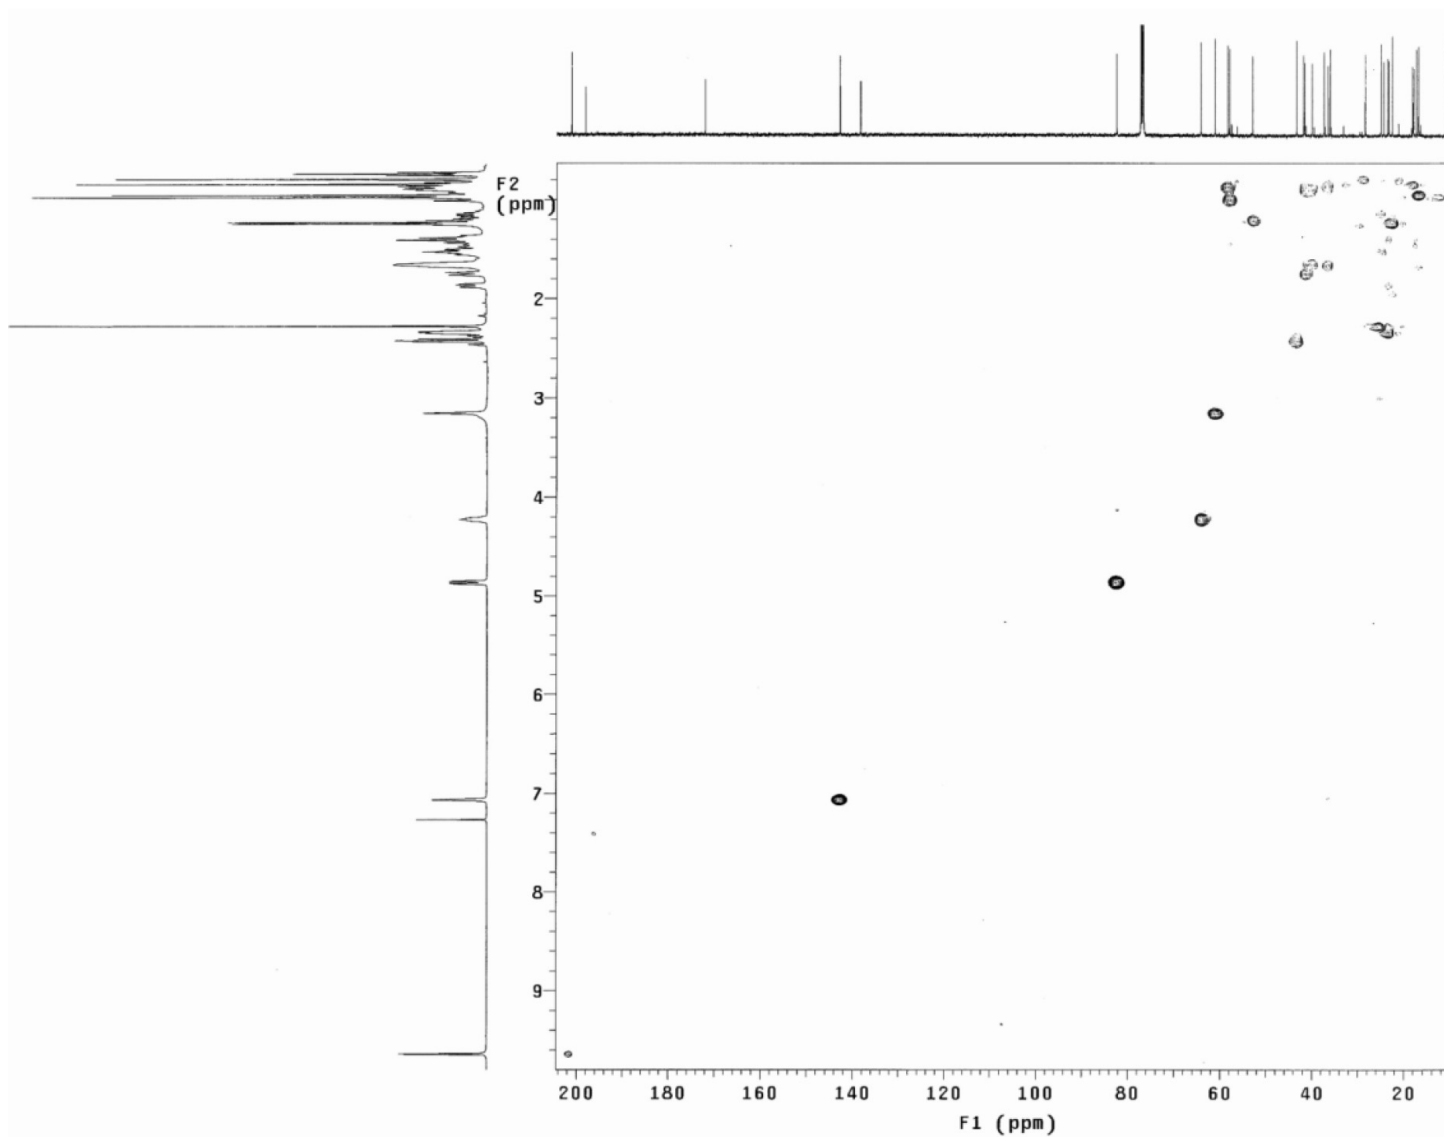

**Figure S6:** HSQC NMR (500 MHz,  $\text{CDCl}_3$ ) spectrum of **1**.



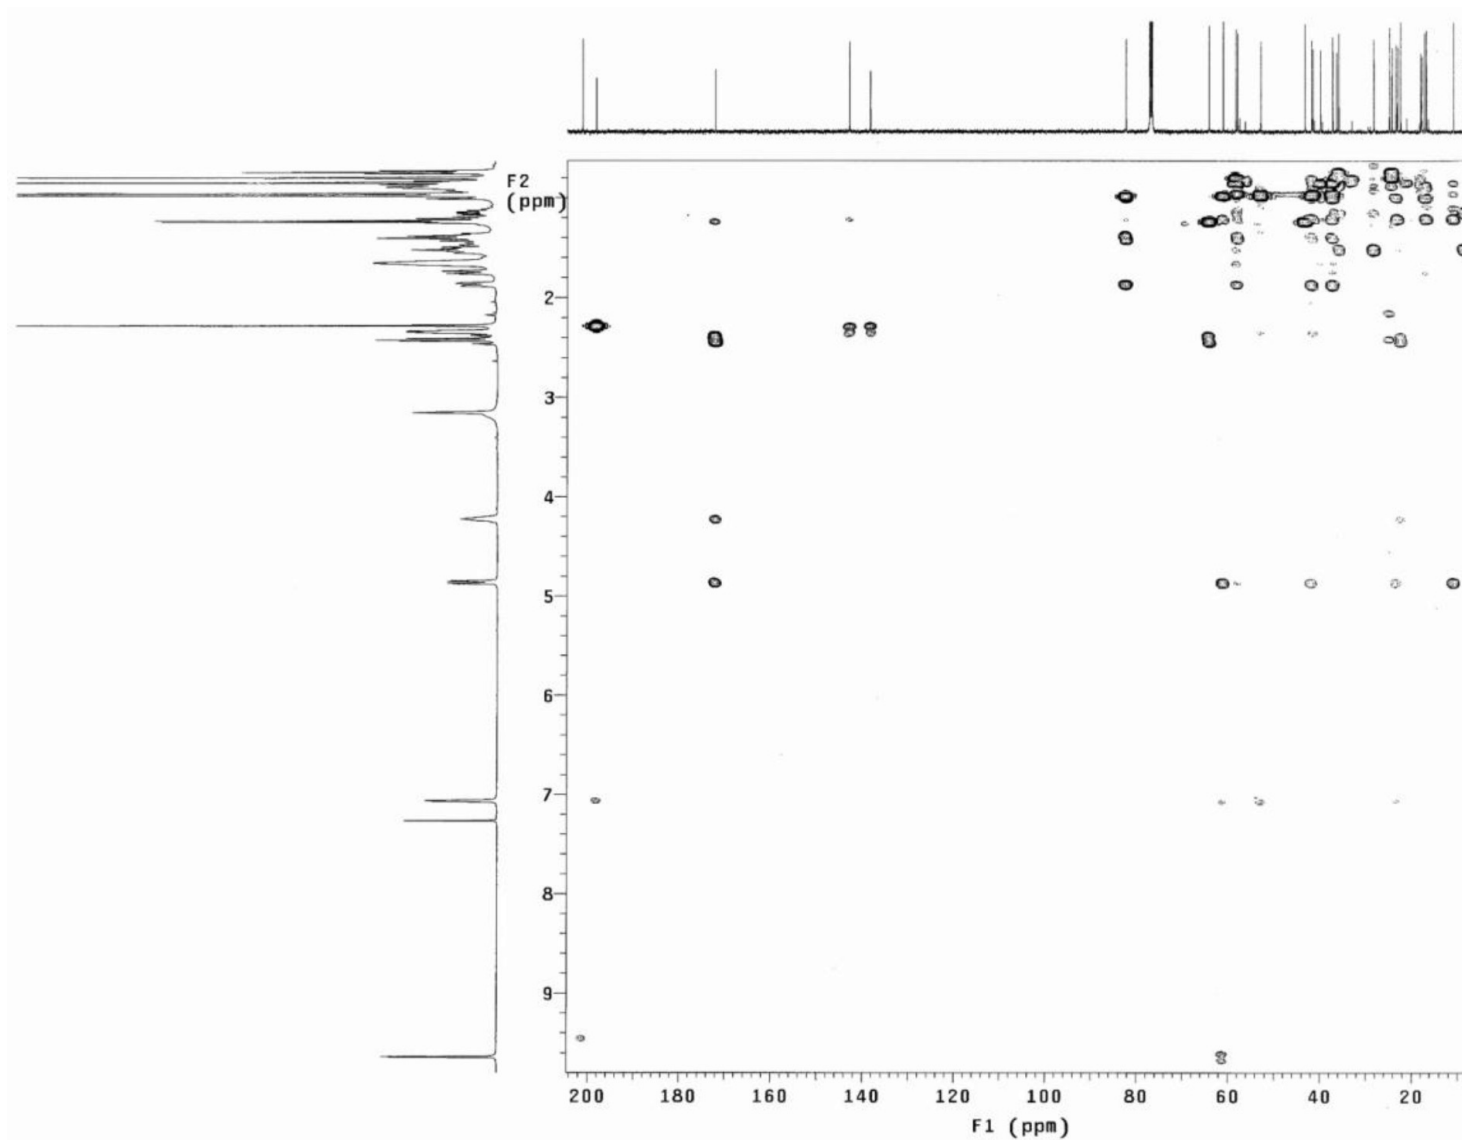

**Figure S7:** HMBC NMR (500 MHz,  $\text{CDCl}_3$ ) spectrum of **1**.

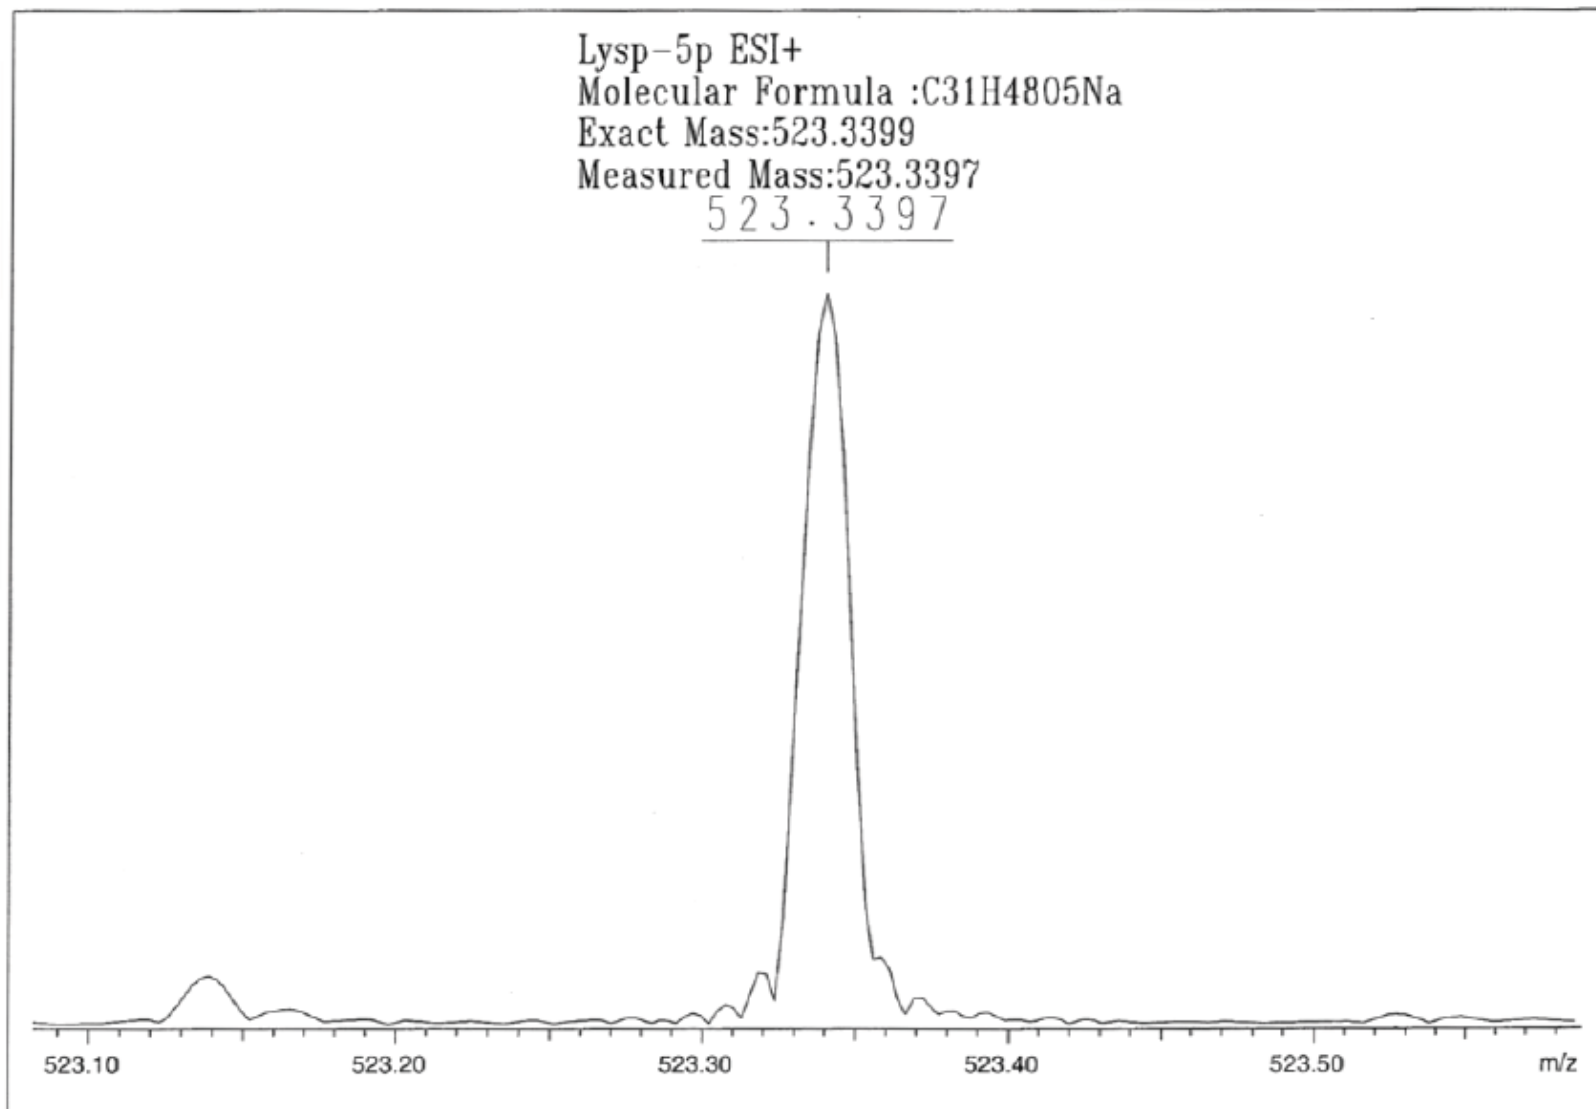

**Figure S8:** HRESIMS spectrum of **1**.

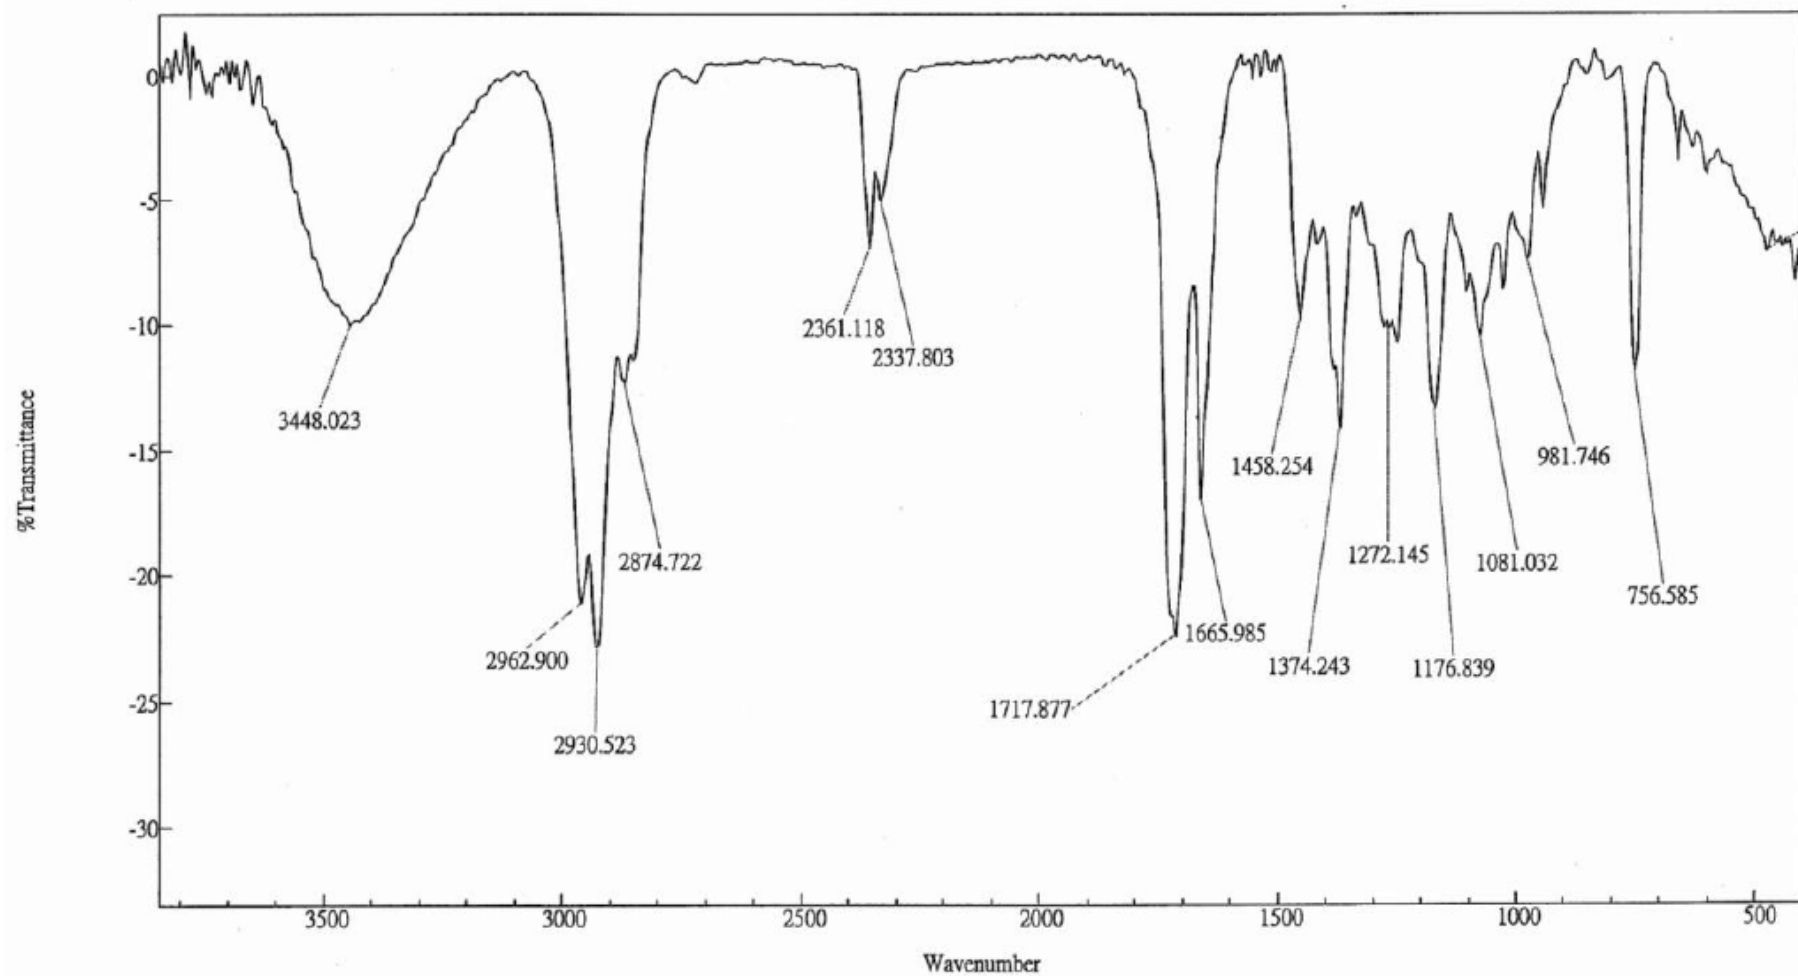

**Figure S9:** IR spectrum of **1**.

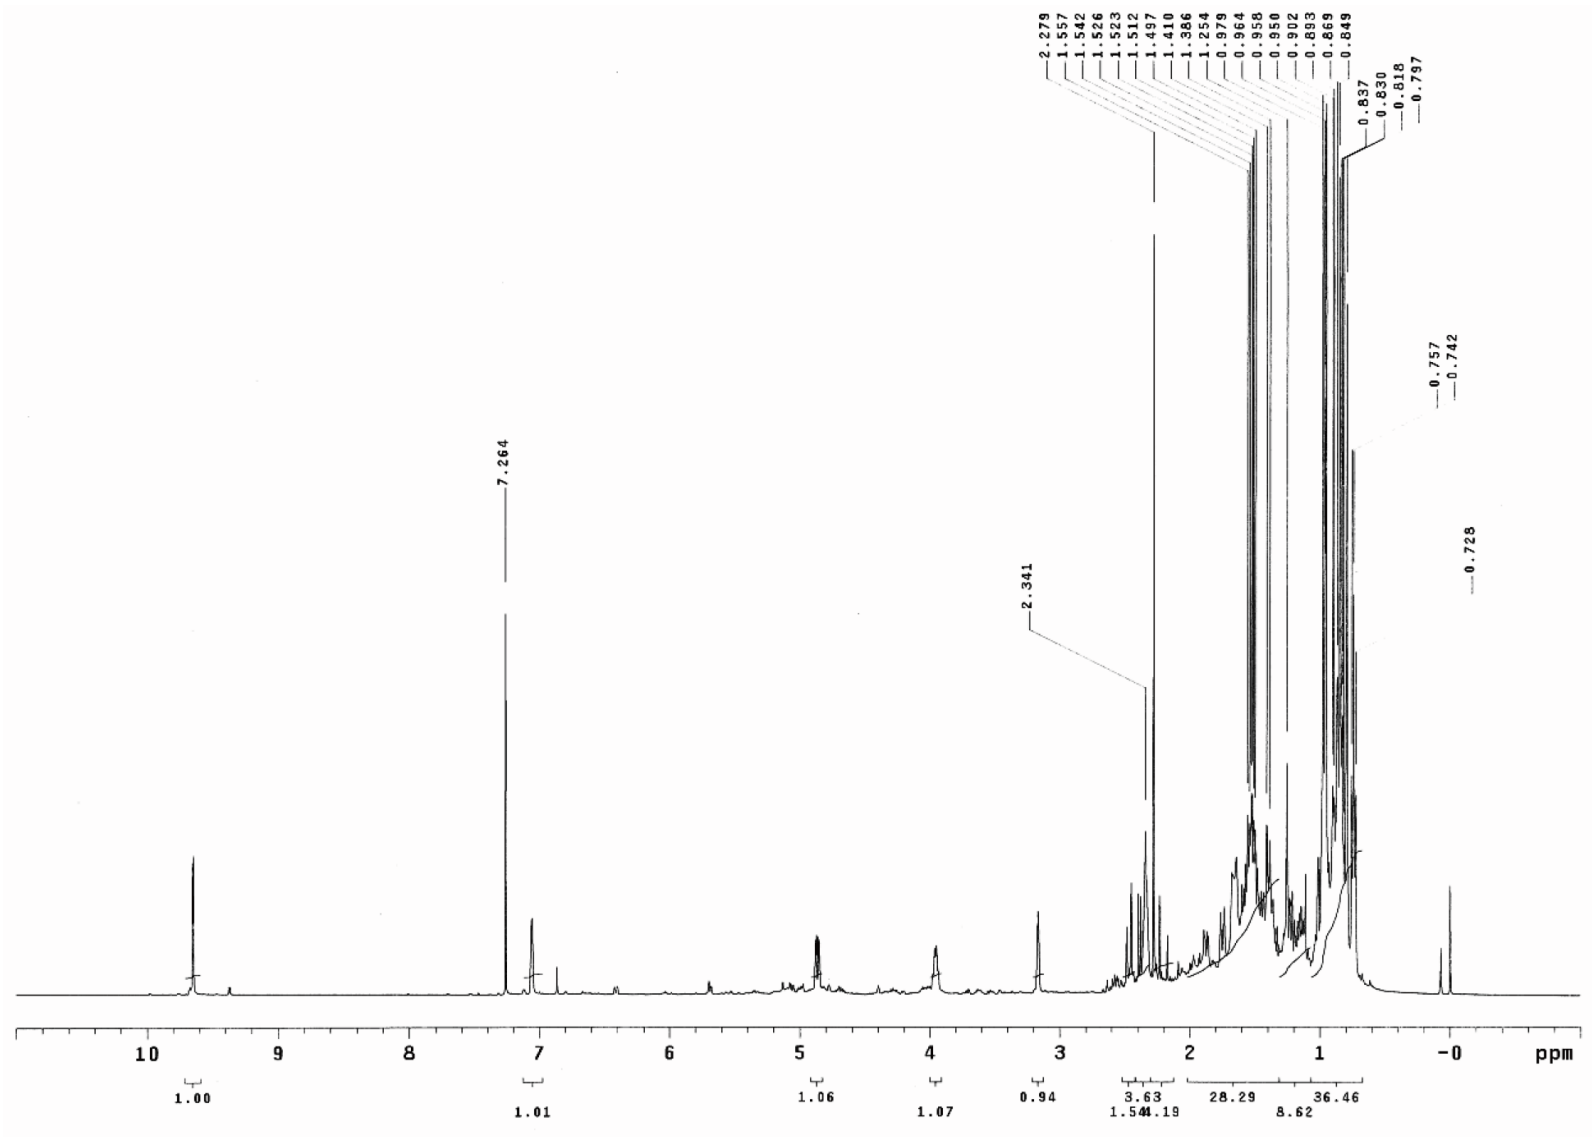

**Figure S10:** <sup>1</sup>H NMR (500 MHz, CDCl<sub>3</sub>) spectrum of **2**.

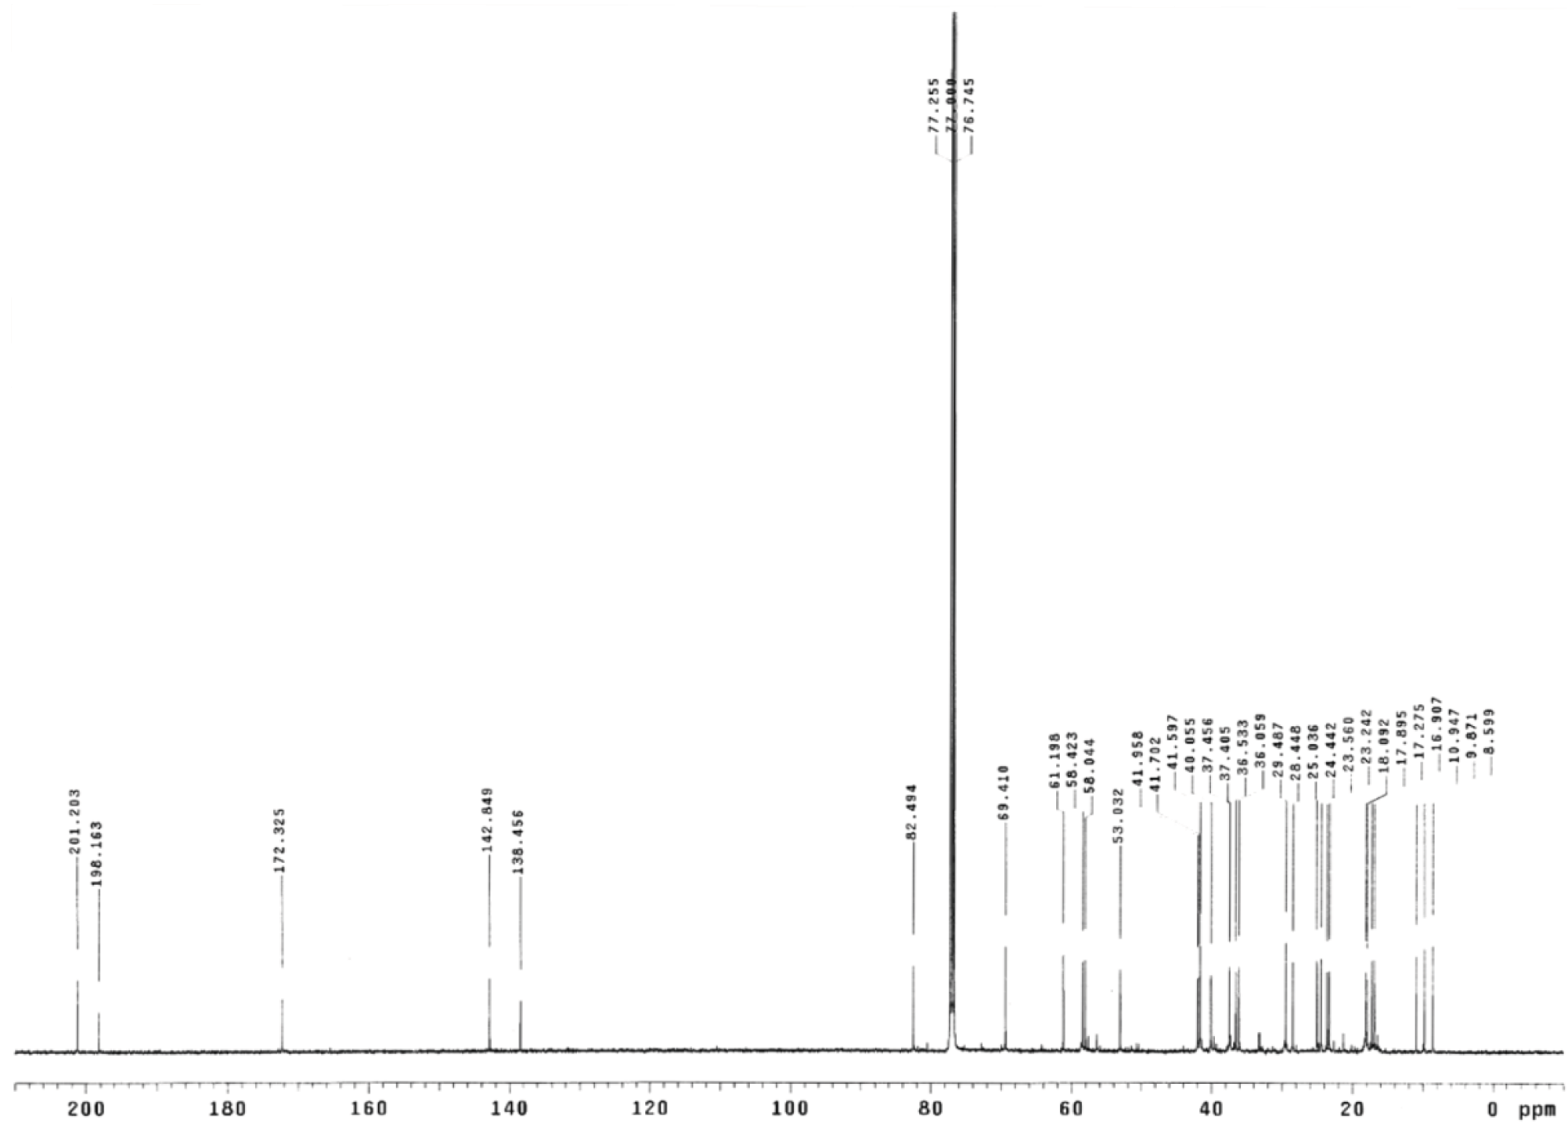

**Figure S11:**  $^{13}\text{C}$  NMR (125 MHz,  $\text{CDCl}_3$ ) spectrum of **2**.

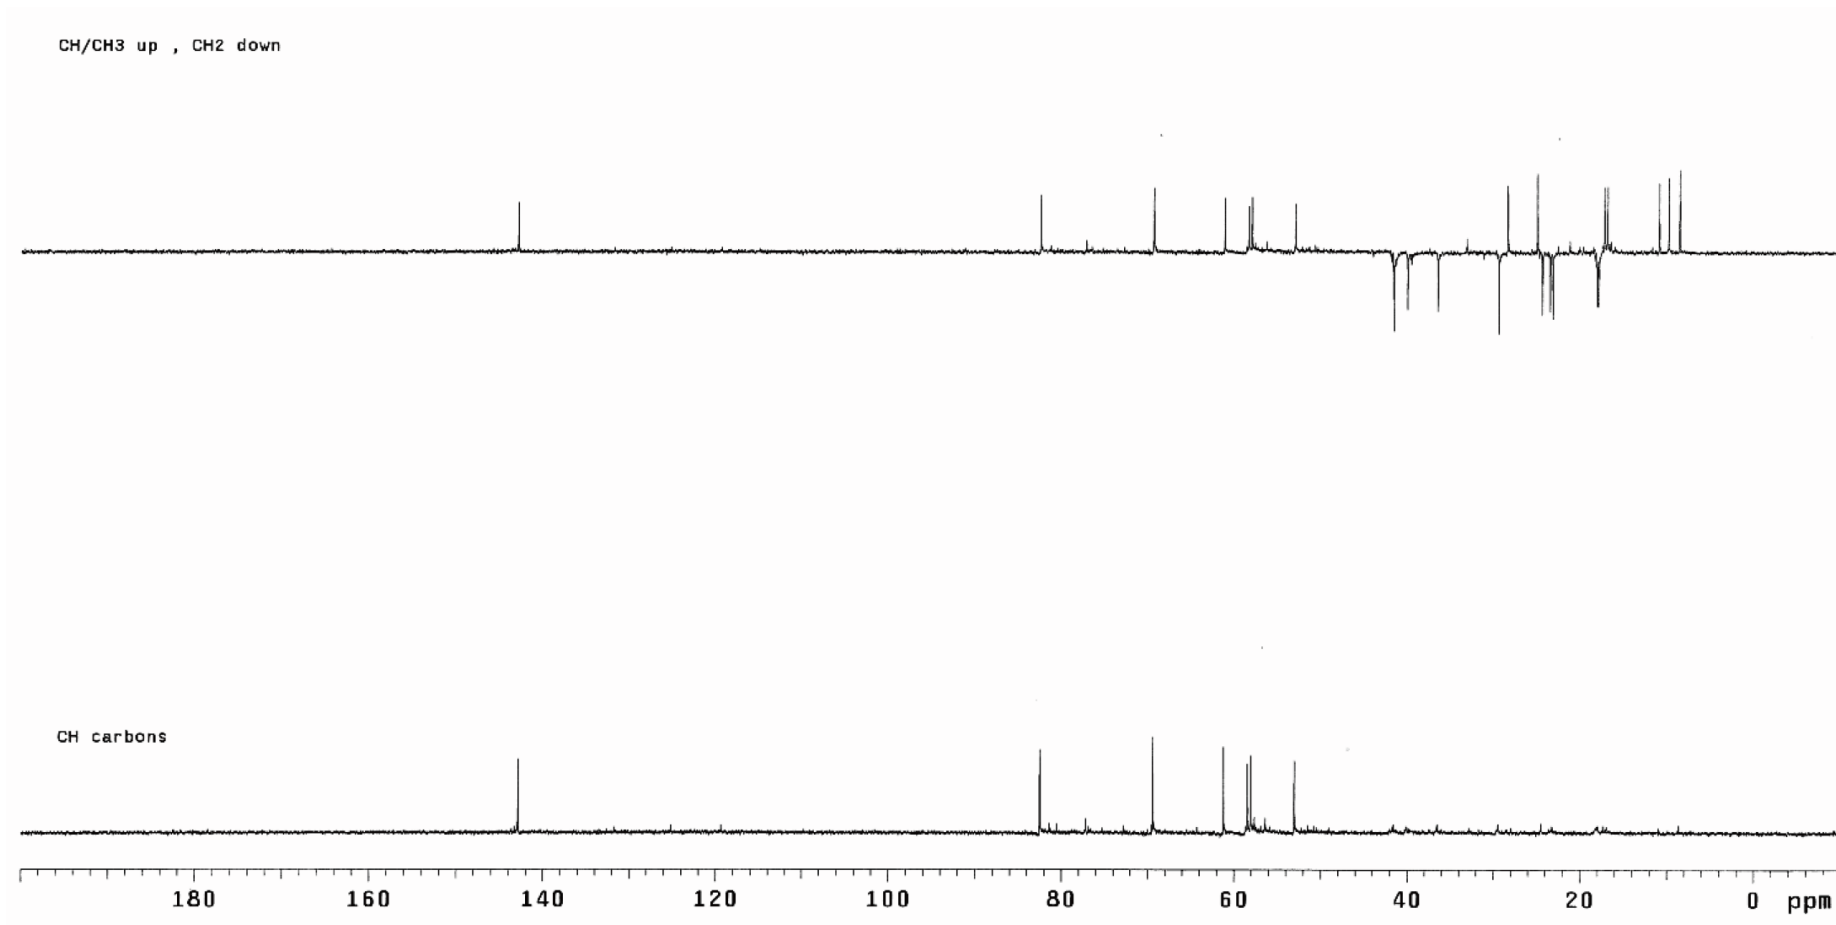

**Figure S12:** DEPT NMR (125 MHz, CDCl<sub>3</sub>) spectrum of **2**.

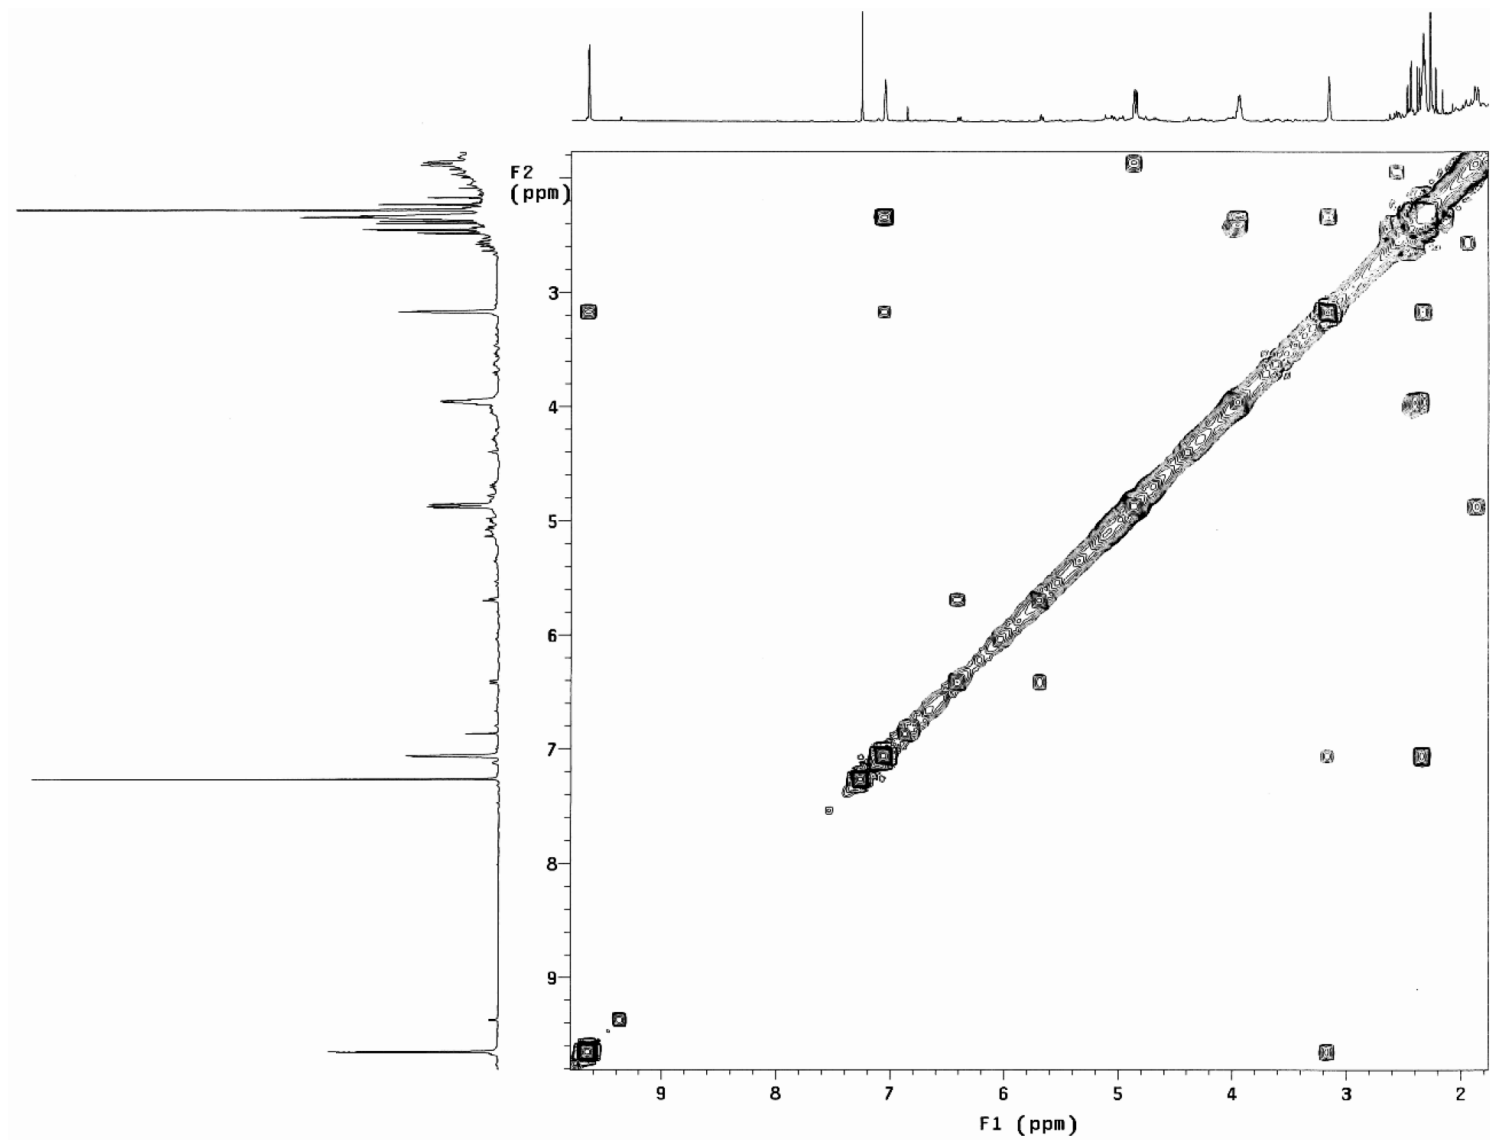

**Figure S13:** COSY NMR (500 MHz, CDCl<sub>3</sub>) spectrum of **2**.

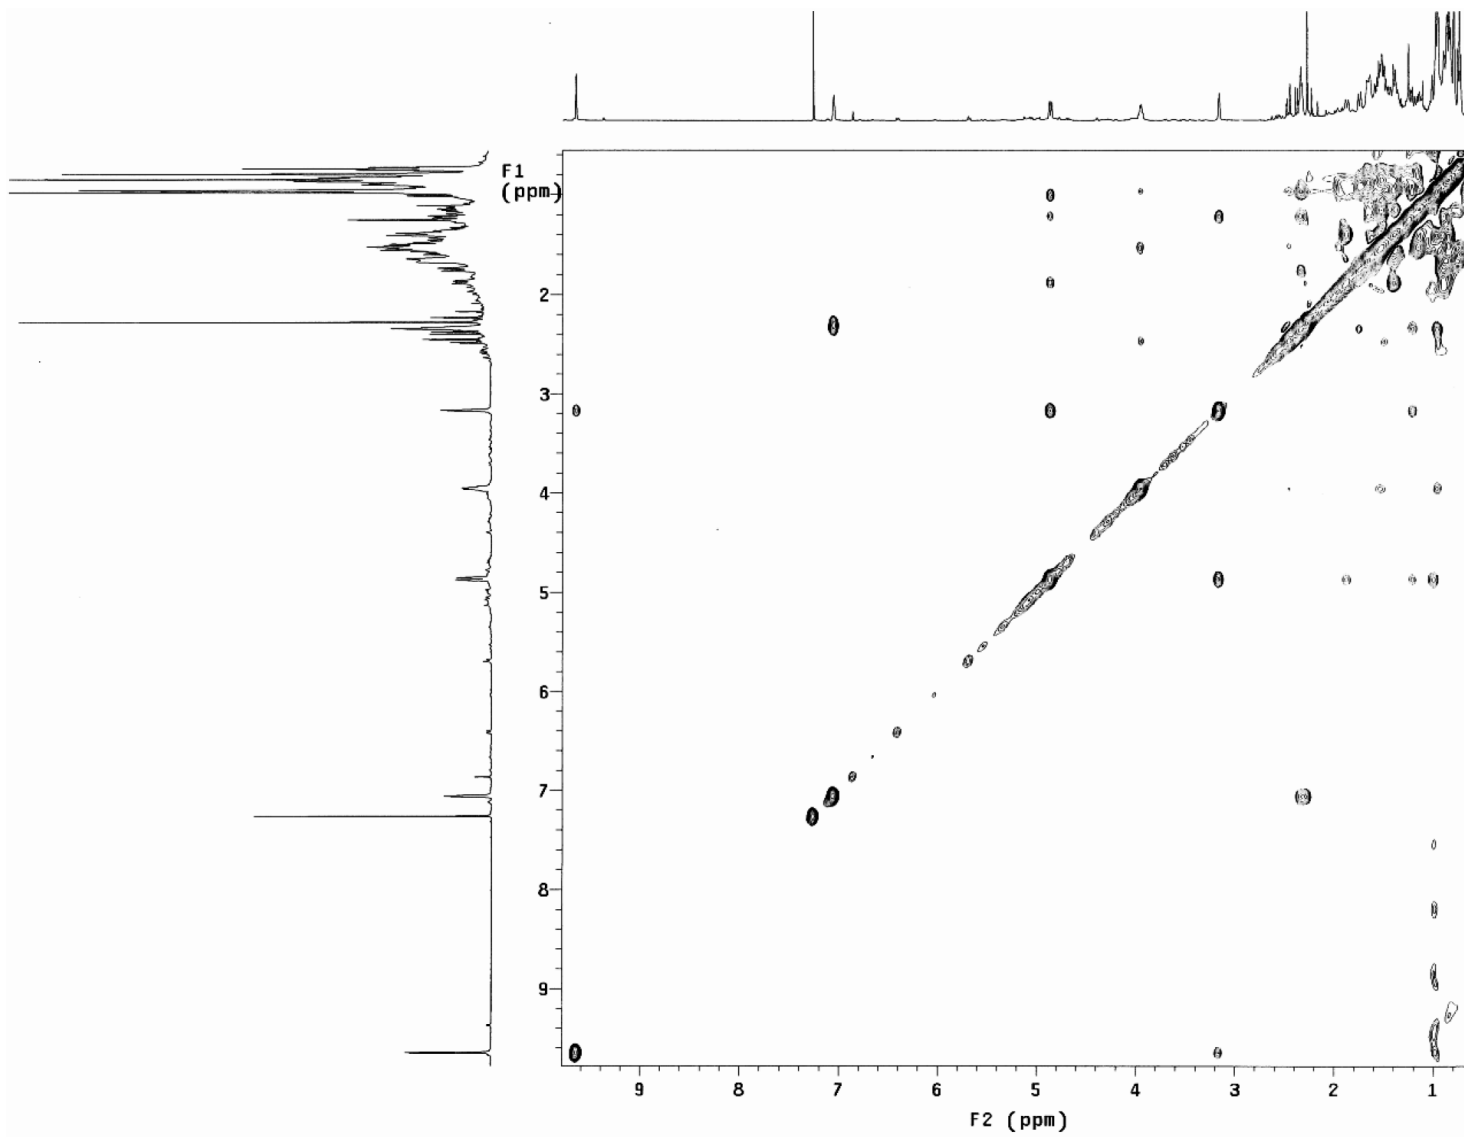

**Figure S14:** NOESY NMR (500 MHz,  $\text{CDCl}_3$ ) spectrum of **2**.



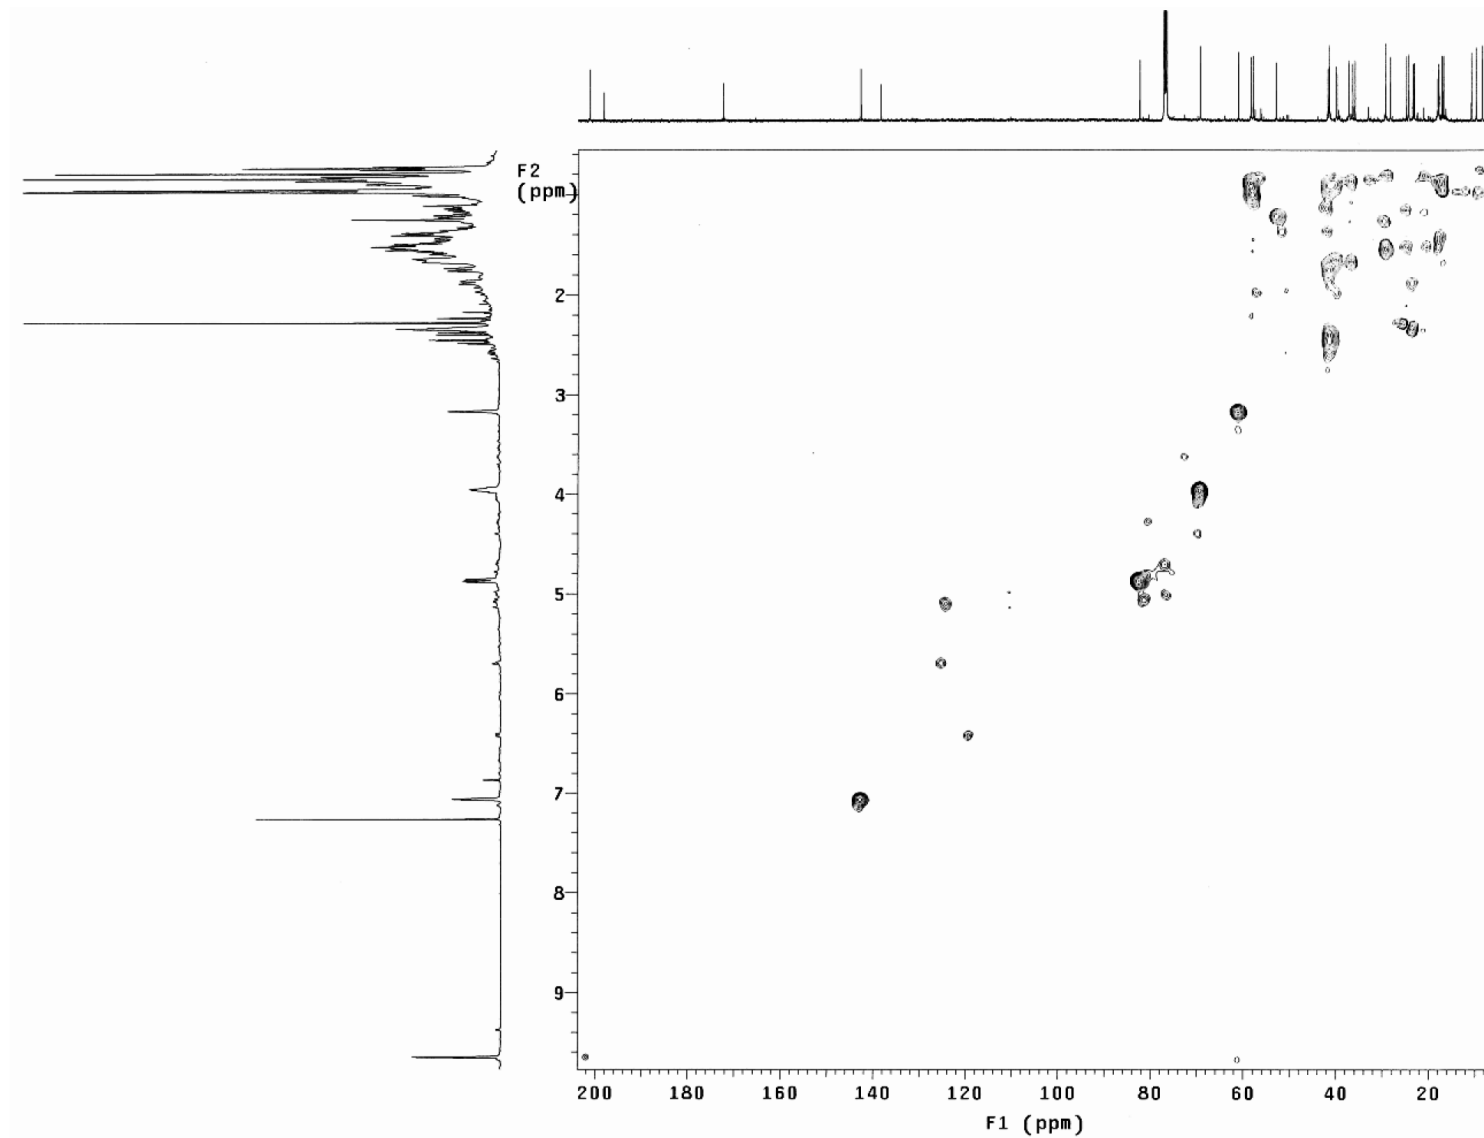

**Figure S15:** HSQC NMR (500 MHz, CDCl<sub>3</sub>) spectrum of **2**.

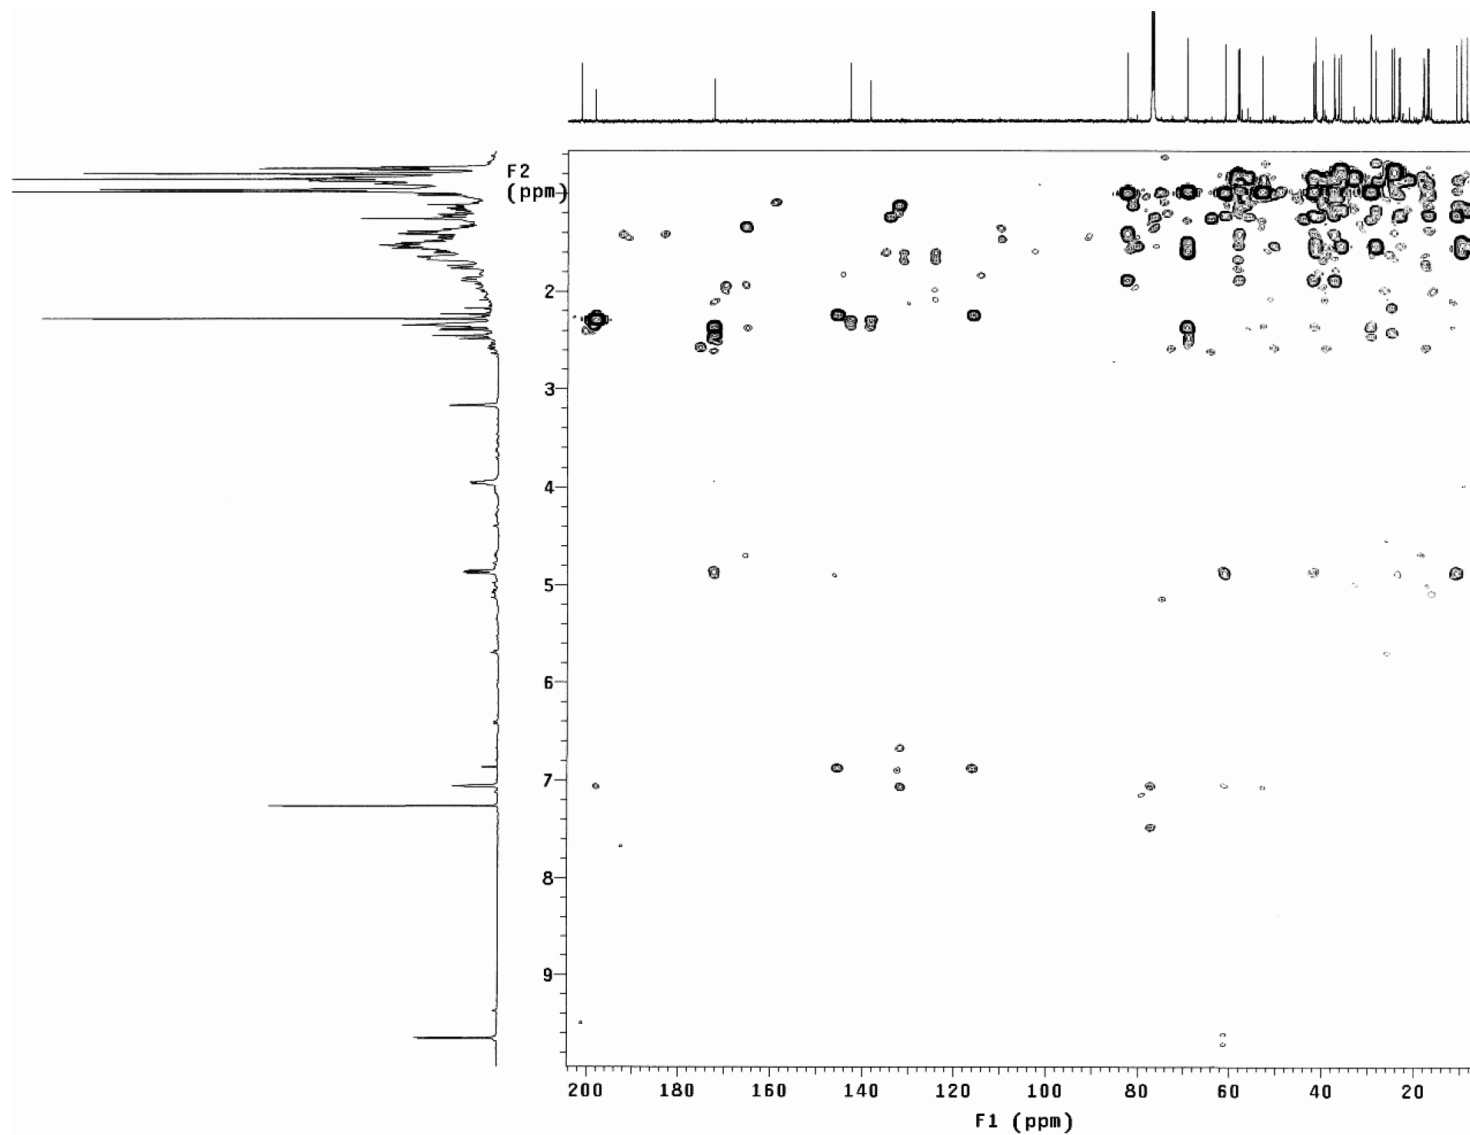

**Figure S16:** HMBC NMR (500 MHz,  $\text{CDCl}_3$ ) spectrum of **2**.

## Mass Spectrum SmartFormula Report

### Analysis Info

Analysis Name D:\Data\b2\lysp9p\_000001.d  
Method broadband first signal  
Sample Name Lysp-9p  
Comment ESI Positive

12/20/2013 10:40:21 AM

Instrument: FT-MS solarix

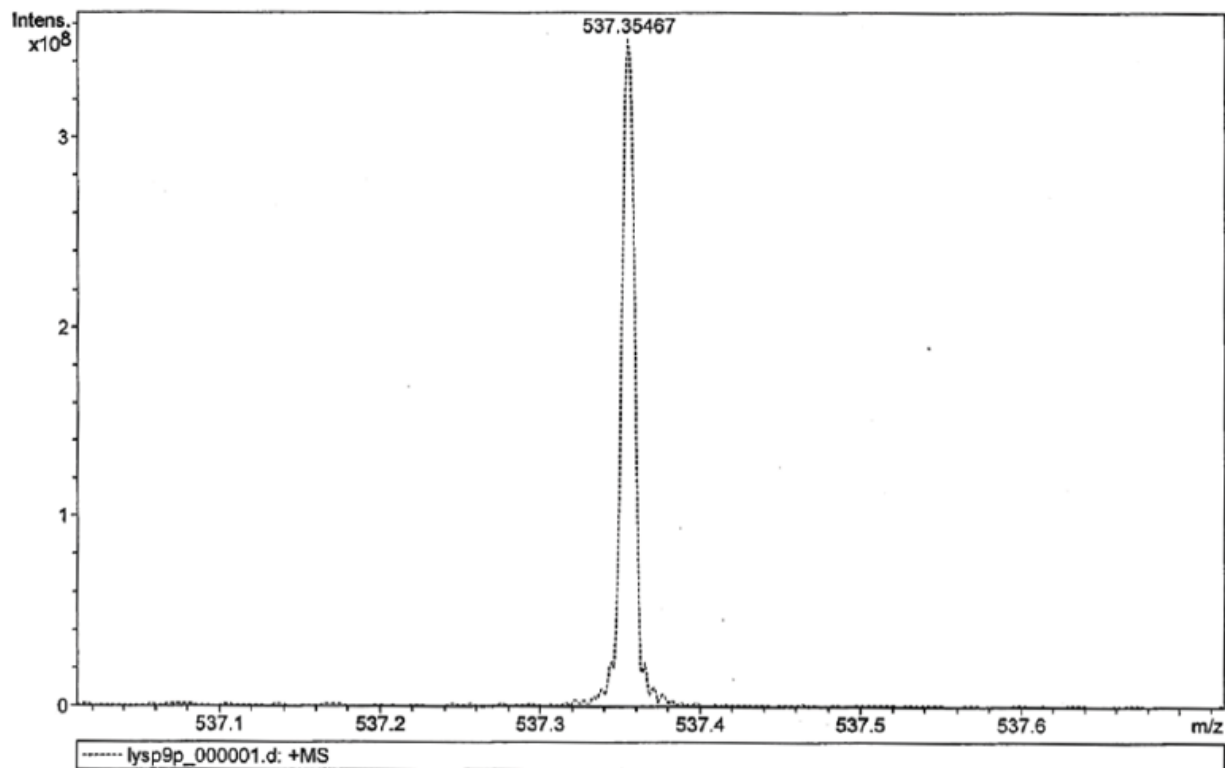

| Meas. m/z | # | Formula                                          | Score  | m/z       | err [mDa] | err [ppm] | mSigma | rdb | e <sup>-</sup> Conf | N-Rule |
|-----------|---|--------------------------------------------------|--------|-----------|-----------|-----------|--------|-----|---------------------|--------|
| 537.35467 | 1 | C <sub>32</sub> H <sub>50</sub> NaO <sub>5</sub> | 100.00 | 537.35505 | 0.37      | 0.70      | 4.8    | 7.5 | even                | ok     |

Figure S17: HRESIMS spectrum of 2.

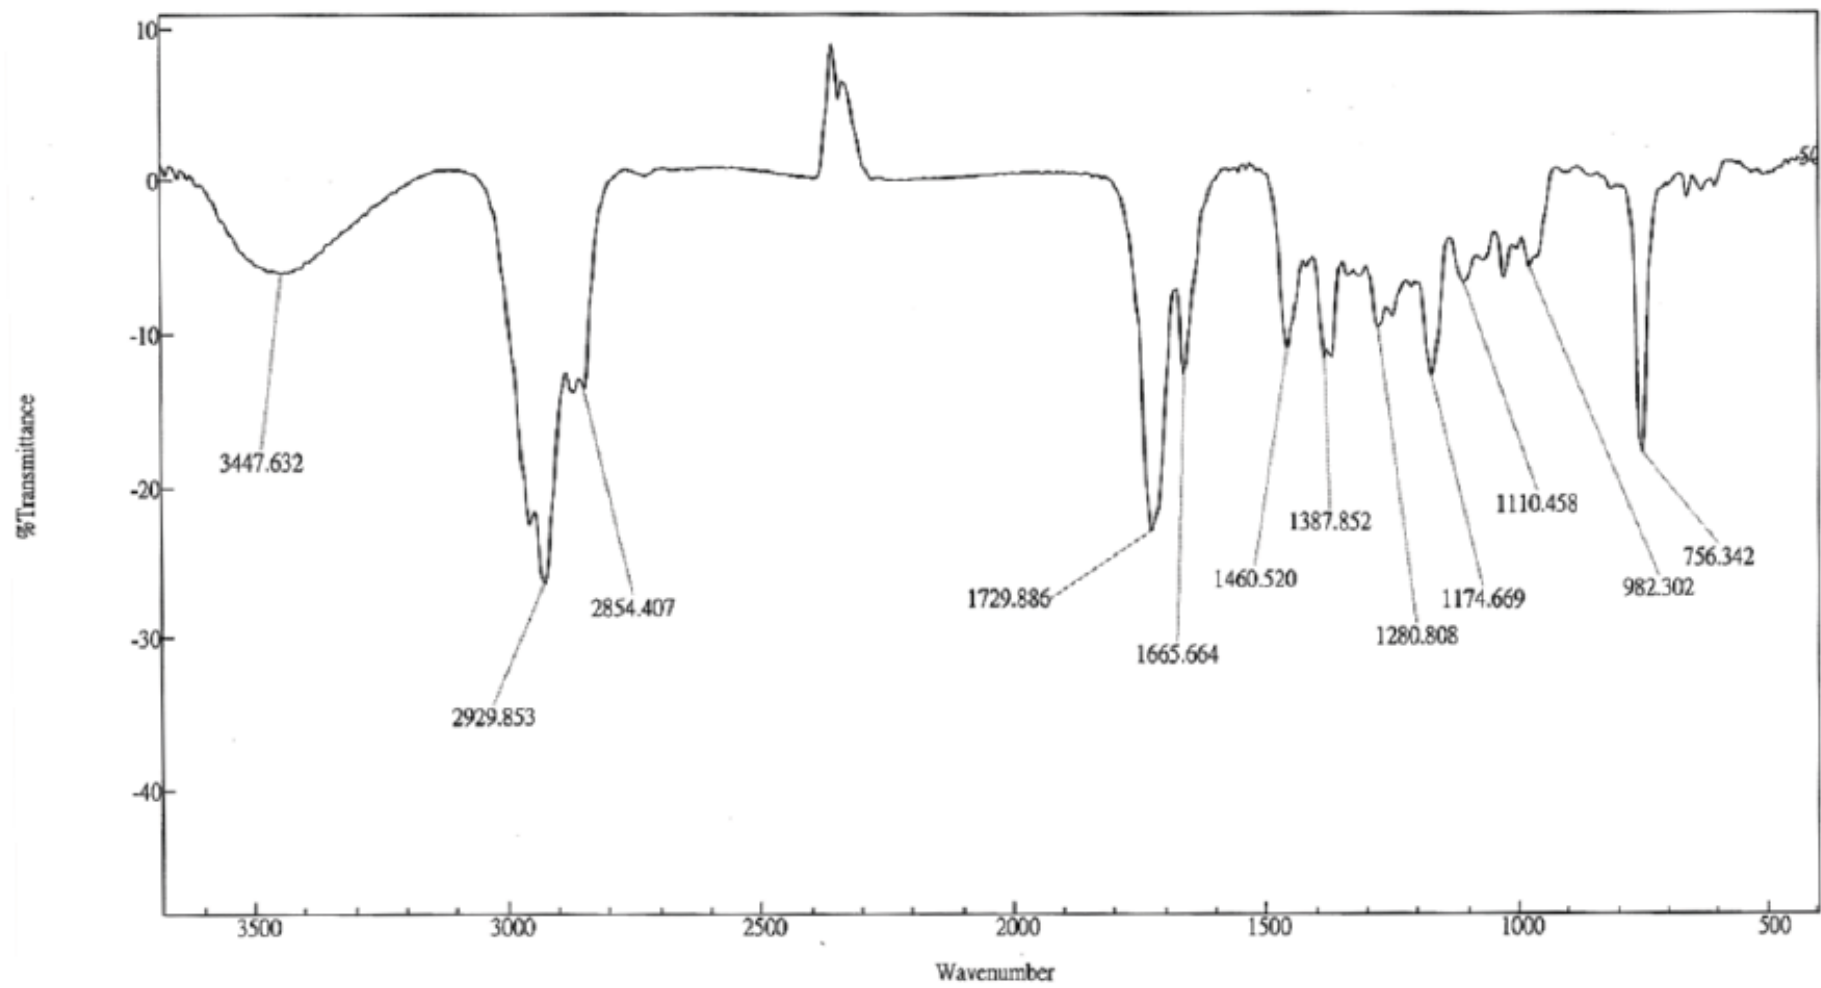

Figure S18: IR spectrum of 2.

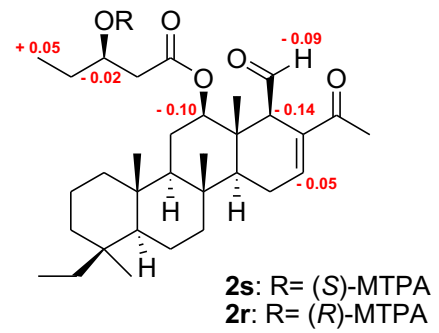

**Figure S19:** Values of  $\Delta\delta_{S-R}$  of the MTPA esters of **2**.

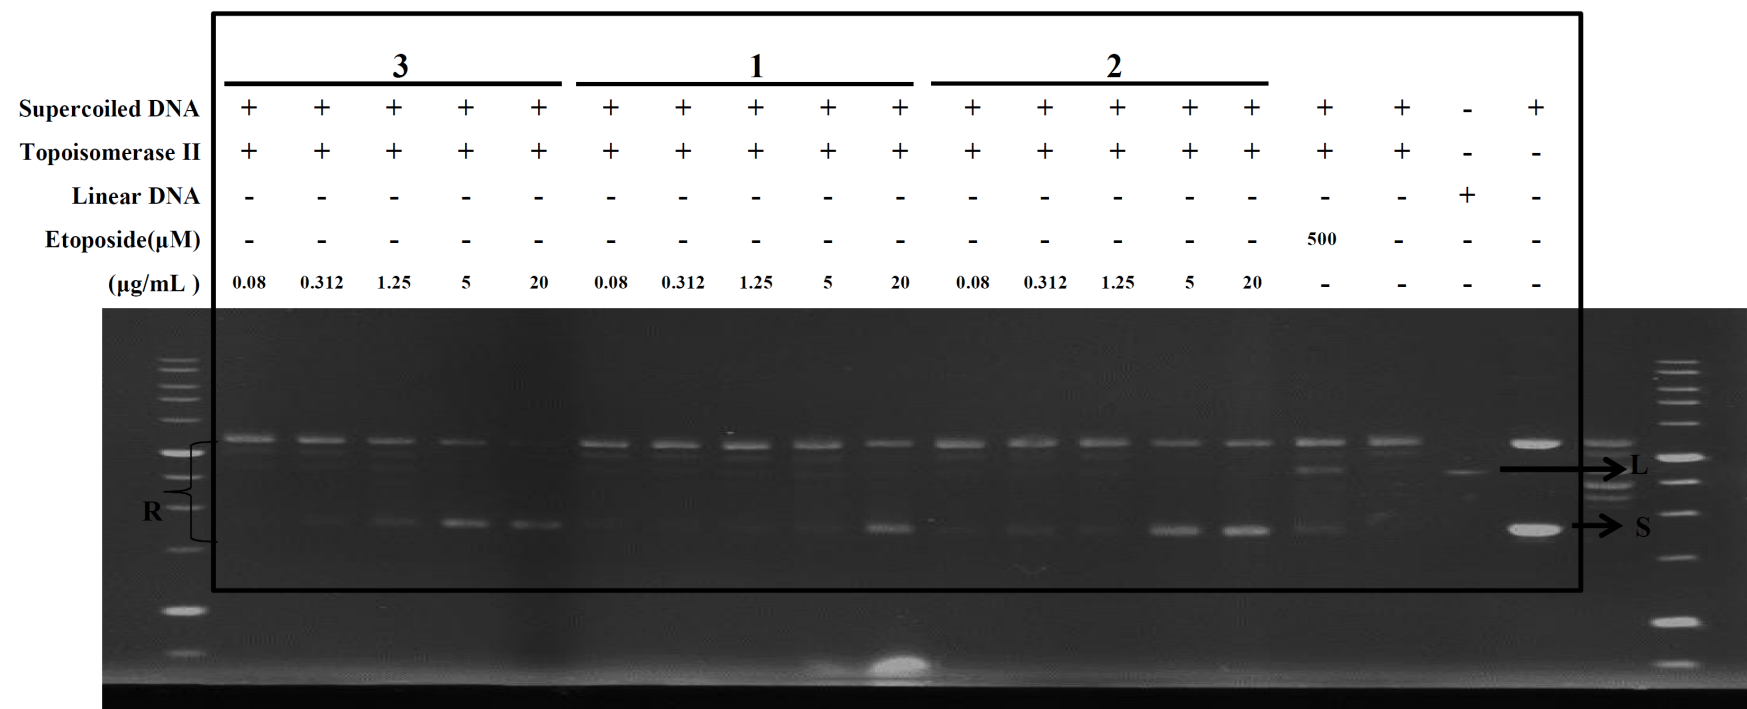

**Figure S20:** The full length gel of Topo II $\alpha$  activity.

Effect of compounds **1-3** on topo II activity. Lanes 1-5: **3** (0.08, 0.3125, 1.25, 5, and 20  $\mu\text{g/mL}$ ); Lanes 6-10: **1** (0.08, 0.3125, 1.25, 5, and 20  $\mu\text{g/mL}$ ); Lanes 11-15: **2** (0.08, 0.3125, 1.25, 5, and 20  $\mu\text{g/mL}$ ); Lane 16: positive control, etoposide (500  $\mu\text{M}$ ), as topo II poison (induction of linear DNA); Lane 17: plasmid DNA + topo II + solvent control (induction of DNA relaxation); Lane 18: Linear DNA; Lane 19: negative control plasmid DNA (supercoiled DNA)

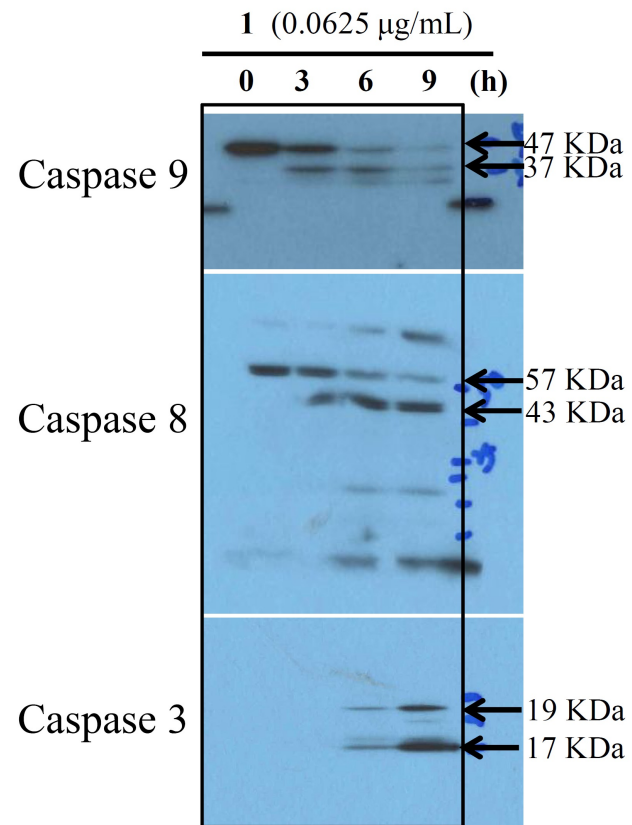

**Figure S21:** The full length blots of caspase 9, 8 and 3 expressions.

Molt 4 cells were treated with 0.0625 μg/mL of compound 1 for the indicated time. Western blot analysis of Caspase 9 at 47 and 37 KDa, Caspase 8 at 57 and 43 KDa, as well as Caspase 3 at 19 and 17 KDa.
